1 **Title: Alpha-mannosidase-2 modulates arbovirus infection in a pathogen- and**  
2 ***Wolbachia*-specific manner in *Aedes aegypti* mosquitoes**

3 Running title: Arbovirus replication in alpha-mannosidase-2 knockout mosquitoes

4

5 Nadya Urakova<sup>1,4</sup>, Renuka E. Joseph<sup>1,2,3</sup>, Allyn Huntsinger<sup>1</sup>, Vanessa M. Macias<sup>1,5</sup>,

6 Matthew J. Jones<sup>1,2</sup>, Leah T. Sigle<sup>1,2</sup>, Ming Li<sup>6</sup>, Omar S. Akbari<sup>6</sup>, Zhiyong Xi<sup>7</sup>, Konstantinos

7 Lympelopoulos<sup>8</sup>, Richard T Sayre<sup>8</sup>, Elisabeth A. McGraw<sup>1,2,3</sup>, Jason L. Rasgon<sup>1,2,3\*</sup>

8 <sup>1</sup>Department of Entomology, The Pennsylvania State University, University Park, PA, United

9 States of America

10 <sup>2</sup>The Center for Infectious Disease Dynamics, The Pennsylvania State University, University

11 Park, PA, United States of America

12 <sup>3</sup>The Huck Institutes of the Life Sciences, The Pennsylvania State University, University Park,

13 PA, United States of America

14 <sup>4</sup>Current affiliation: Leiden University Medical Center, Leiden, Netherlands

15 <sup>5</sup>Curent affiliation: Department of Biological Sciences, University of North Texas, Denton,

16 TX, United States of America

17 <sup>6</sup>Division of Biological Sciences, Section of Cell and Developmental Biology, University of

18 California, San Diego, La Jolla, CA, United States of America

19 <sup>7</sup>Department of Microbiology and Molecular Genetics, Michigan State University, East

20 Lansing, MI, United States of America

21 <sup>8</sup>Pebble Labs, Little Fly Division, Los Alamos, NM, United States of America

22

23 \* Corresponding author, [jlr54@psu.edu](mailto:jlr54@psu.edu)

24 **Abstract**

25 Multiple *Wolbachia* strains can block pathogen infection, replication, and/or transmission in  
26 *Aedes aegypti* mosquitoes under both laboratory and field conditions. However, *Wolbachia*  
27 effects on pathogens can be highly variable across systems and the factors governing this  
28 variability are not well understood. It is increasingly clear that the mosquito host is not a passive  
29 player in which *Wolbachia* governs pathogen transmission phenotypes; rather, the genetics of  
30 the host can significantly modulate *Wolbachia*-mediated pathogen blocking. Specifically,  
31 previous work linked variation in *Wolbachia* pathogen blocking to polymorphisms in the  
32 mosquito alpha-mannosidase 2 ( $\alpha$ Man2) gene. Here we use CRISPR-Cas9 mutagenesis to  
33 functionally test this association. We developed  $\alpha$ Man2 knockouts and examined effects on  
34 both *Wolbachia* and virus levels, using both dengue virus (DENV; *Flaviviridae*) and Mayaro  
35 virus (MAYV; *Togaviridae*). *Wolbachia* titers were significantly elevated in  $\alpha$ Man2 knockout  
36 (KO) mosquitoes, but there were complex interactions with virus infection and replication. In  
37 *Wolbachia*-uninfected mosquitoes, the  $\alpha$ Man2 KO mutation was associated with decreased  
38 DENV titers, but in a *Wolbachia*-infected background, the  $\alpha$ Man2 KO mutation significantly  
39 modulated virus blocking. In contrast, the  $\alpha$ Man2 KO mutation significantly increased MAYV  
40 replication in *Wolbachia*-uninfected mosquitoes and did not affect *Wolbachia*-mediated virus  
41 blocking. These results demonstrate that  $\alpha$ Man2 modulates arbovirus infection in *Ae. aegypti*  
42 mosquitoes in a pathogen- and *Wolbachia*-specific manner, and that *Wolbachia*-mediated  
43 pathogen blocking is a complex phenotype dependent on the mosquito host genotype and the  
44 pathogen. These results have significant impact for the design and use of *Wolbachia*-based  
45 strategies to control vector-borne pathogens.

46

47 **Key words:** *Aedes aegypti*, alpha-mannosidase 2, dengue virus, Mayaro virus, *Wolbachia*

## 48 **Introduction**

49 Dengue virus (DENV) (genus *Flavivirus*, family *Flaviviridae*) is an important human pathogen  
50 that is transmitted primarily by *Aedes aegypti* mosquitoes [1]. Mayaro virus (MAYV) (genus  
51 *Alphavirus*, family *Togaviridae*) is an emerging human pathogen that is transmitted mainly by  
52 *Haemagogus janthinomys* mosquitoes; however, *Ae. aegypti* mosquitoes are also competent  
53 vectors for this virus [2]. There are no approved vaccines or specific antivirals to prevent and  
54 manage disease outbreaks that are caused by either virus and thus novel strategies for disease  
55 control are needed to combat arbovirus infections. The use of the intracellular invertebrate-  
56 specific bacterium *Wolbachia* as a biological control agent against *Ae. aegypti* has emerged as  
57 an innovative vector control strategy to reduce arbovirus transmission. *Wolbachia* is useful  
58 because, when incorporated into *Ae. aegypti* mosquitoes, it suppresses vector populations via  
59 a reproductive manipulation called cytoplasmic incompatibility (CI) [3–5] and also prevents  
60 replication of viruses inside mosquitoes, a trait known as pathogen blocking (PB), thereby  
61 limiting subsequent virus transmission to humans [5].

62  
63 *Wolbachia*-mediated pathogen blocking (PB) phenotypes in mosquitoes depend not just on the  
64 infecting *Wolbachia* strain, but also on many other factors including pathogen, infection type  
65 (natural vs. artificial), environmental conditions, and, importantly, host genetics [6-7]. Ford et  
66 al. found enough standing genetic variation in Australian *Ae. aegypti* to select for significant  
67 weakening of PB within a few generations of artificial selection, suggesting that the host  
68 genetic background can have a strong effect on PB [6]. Identified candidate mosquito host  
69 genes for this modulation were not the canonical suspects of mosquito innate immunity or  
70 detoxification; rather, they were primarily related to cell adhesion, Notch signaling, and cell  
71 cycle [6,7], highlighting our current lack of mechanistic understanding of the PB phenomenon.

72

73 Ford et al. identified single nucleotide polymorphisms in the non-coding region of the alpha-  
74 mannosidase 2 ( $\alpha$ Man2) gene that were strongly associated with PB strength in *Wolbachia*-  
75 infected *Ae. aegypti* mosquitoes selected for high vs. low *Wolbachia*-mediated PB of DENV  
76 [6].  $\alpha$ Man2 is putatively involved in protein glycosylation [8], and thus could alter PB by  
77 modulating viral glycosylation. Protein glycosylation, the enzymatic attachment of  
78 oligosaccharide structures to the peptide backbone, is an important post-translational  
79 modification for both host cell and viral proteins [9–11]. In eukaryotic cells, glycosylation is  
80 responsible for many functions, including proper protein folding, trafficking, stability,  
81 receptor-ligand recognition, and cell adhesion [9]. Viruses do not have their own protein  
82 glycosylation machinery and employ host cellular enzymes for this purpose [10]. Glycosylation  
83 of viral proteins plays a crucial role in the lifecycles of many viruses, influencing virus  
84 infectivity, pathogenicity, and host immune responses [11,12]. Enzymes involved in protein  
85 glycosylation are important potential targets to control viral replication in eukaryotic cells  
86 [13,14]. However, how specific genes in these pathways affect arboviral replication in  
87 mosquito vectors is poorly understood.

88

89 In this study we used CRISPR-Cas9 gene editing to ablate the  $\alpha$ Man2 gene in *Ae. aegypti* and  
90 examined effects of gene knock-out (KO) on mosquito vector competence for DENV and  
91 MAYV in both *Wolbachia*-infected and uninfected mosquitoes. Results demonstrated  
92 complicated interactions between gene KO, *Wolbachia* infection, and viral pathogen,  
93 highlighting the complex nature of *Wolbachia* PB phenotypes.

94

## 95 **Materials and methods**

96 *Cells*: African green monkey kidney (Vero, ATCC CCL-81) cells were obtained from ATCC  
97 (Manassas, VA, USA) and maintained in Dulbecco's Modified Eagle Medium (DMEM)

98 (Gibco/Thermo Fisher, Waltham, MA, USA) supplemented with 10% fetal bovine serum  
99 (FBS) (Gibco/Thermo Fisher), 100 ug/mL of streptomycin (Gibco/Thermo Fisher) and 100  
100 units/mL of penicillin (Gibco/Thermo Fisher) at 37°C in 5% CO<sub>2</sub>. *Aedes albopictus* cells  
101 (C6/36) were obtained from Sigma-Aldrich, St. Louis, MO, USA, and maintained in RPMI  
102 1640 medium (Gibco/Thermo Fisher) supplemented with 10% FBS (Gibco/Thermo Fisher),  
103 100 ug/mL of streptomycin (Gibco/Thermo Fisher) and 100 units/mL of penicillin  
104 (Gibco/Thermo Fisher) at 28°C.

105

106 *Viruses*: MAYV strain BEAN343102 (GenBank: KP842802.1) was obtained from BEI  
107 Resources, NIAID, NIH (Manassas, VA, USA). To produce MAYV stocks, virus was  
108 propagated on Vero cells for 24 hours and stored at - 80°C. DENV serotype 2 strain JAM 1409  
109 [15] was propagated on C6/36 cells for 7 days as previously described [16]. MAYV stocks  
110 were initially quantified by plaque assay, while DENV stocks were initially quantified by  
111 qPCR. In mosquito infection experiments, viruses were quantified by focus-forming assay  
112 (FFAs; see below for specific methods).

113

114 *Antibodies*: Mouse monoclonal anti-alphavirus antibodies (G77L) (#MA5-18173) were  
115 obtained from Thermo Fisher and used in FFAs to detect MAYV at a dilution of 1:40 and  
116 incubated at 4 °C overnight. Mouse monoclonal anti-flavivirus group antigen antibodies, clone  
117 D1-4G2-4-15 (produced *in vitro*) (NR-50327) were obtained from BEI Resources, NIAID, NIH  
118 (Manassas, VA, USA). These antibodies were used in FFAs for the detection of DENV  
119 antigens at a dilution of 1:500 and incubated at 4 °C overnight. Goat anti-mouse IgG (H+L)  
120 highly cross-adsorbed secondary antibodies, Alexa Fluor 488 (A-11029) were purchased from  
121 Invitrogen. Secondary antibodies were used in FFAs at a dilution of 1:1,000 and incubated at  
122 a room temperature for at least 3 hours or at 4 °C overnight.

123

124 *Plaque assay for the quantification of MAYV stocks:* For quantification of MAYV viral stocks,  
125 Vero cells were seeded in 6-well plates at a density of  $5 \times 10^5$  cells/well. Ten-fold serial dilutions  
126 of virus stocks were prepared in PBS and 200  $\mu$ L of these dilutions were used for infections.  
127 Cells were infected for 1 hour at 37°C, infectious media removed, and cells covered with 1 mL  
128 of complete DMEM medium containing 0.5% agarose. Three days post-infection, cells were  
129 fixed with 4% formaldehyde (Sigma-Aldrich) in phosphate-buffered saline (PBS)  
130 (Gibco/Thermo Fisher) for 25 min, agarose covers were removed, and cells were stained for  
131 5 min using aqueous solution containing 1% crystal violet and 20% ethanol to visualize  
132 plaques.

133

134 *qPCR for the quantification of DENV stocks:* Viral RNA was purified using Direct-zol RNA  
135 kit (Zymo Research) according to the manufacturer's instructions and used as template in  
136 qPCRs. All primer sequences are in Table 1. qPCRs were set up using TaqMan™ Fast Virus  
137 1-Step Master Mix (Thermo Fisher) and run on an ABI 7500 Fast Real-time PCR System  
138 (Applied Biosystems/Thermo Fisher). The thermocycling conditions were as follows: 50 °C  
139 for 5 min; 95 °C for 20 s; 35 cycles of 95 °C for 3 s; 60 °C for 30 s; 72 °C for 1 s; and 40 °C  
140 for 10 s. Product was detected by measuring the fluorescence signal from the FAM reporter. A  
141 standard reference curve of known quantities of a DENV-2 genomic fragment was used for  
142 absolute quantification by qPCR. The DENV-2 genomic fragment was inserted into a plasmid  
143 and transformed into *E. coli* as previously described [16]. The linearized and purified fragment  
144 was serially diluted ranging from  $10^7$ -  $10^2$  copies and were used to create a standard curve of  
145 DENV amplification. The standard curve was run in duplicate on each 96-well plate, and the  
146 limits of detection were set at  $10^2$  copies.

147

148 *Mosquito rearing: Ae. aegypti* mosquitoes (Liverpool genetic background) expressing Cas9  
149 protein in the germline (AAEL006511-Cas9; [17]) were provided by Dr. Omar Akbari, UC  
150 San Diego. *Ae. aegypti* mosquitoes stably infected with the wAlbB strain of *Wolbachia* were  
151 provided by Prof. Zhiyong Xi, Michigan State University. Mosquitoes were reared at the PSU  
152 Millennium Sciences Complex insectary under the following environmental conditions:  
153 27±1°C, 12:12 hours light:dark diurnal cycle, 80% relative humidity. For reproduction,  
154 mosquitoes were maintained on expired anonymous human blood using a 37 °C water-jacketed  
155 membrane feeder. Larvae were fed on koi fish pellets (TetraPond). Adult mosquitoes were  
156 maintained on 10% sucrose solution.

157

158 *Preparation of single guide RNAs (sgRNAs):* The  $\alpha$ Man2 Entrez Gene ID 5564678 gene  
159 sequence was used as a reference to design sgRNAs using CRISPOR [18]. sgRNAs were  
160 produced using overlapping nucleotides with the MegaScript T7 (Invitrogen/Thermo Fisher)  
161 *in vitro* transcription system. PCR templates for sgRNAs were produced using Phusion High-  
162 Fidelity DNA polymerase. The thermocycling conditions were as follows: 98 °C for 20 s; 35  
163 cycles of 98 °C for 1 min s; 58 °C for 1 min; 72 °C for 1 min; and a final extension of 72°C for  
164 7 min. Oligonucleotide sequences are given in Table 1. PCR products were purified using  
165 NucleoSpin Gel and PCR Clean-Up kit (Takara Bio, Kusatsu, Shiga, Japan), and 600 ng-1 ug  
166 of DNA templates were added to set up *in vitro* transcription reactions. Reactions were run for  
167 16 hours at 37°C, treated with Turbo DNase according to manufacturers' instructions and  
168 purified using the MegaClear column purification kit (Thermo Fisher). The purified sgRNAs  
169 were tested with an *in vitro* cleavage assay. To produce a DNA template, genomic DNA  
170 (gDNA) from *Ae. aegypti* mosquitoes was purified using E.Z.N.A. MicroElute Genomic DNA  
171 Kit (Omega Bio-tek, Norcross, GA, USA) and the target region was amplified using Phire  
172 Animal Tissue Direct PCR Kit (Thermo Fisher) as described below. Reactions containing DNA

173 template, individual sgRNAs and Cas9 protein in 1X NEB 3.1 buffer (New England Biolabs,  
174 Ipswich, MA, USA) were incubated at 37°C for 2 h, and diagnostic bands were visualized by  
175 electrophoresis on 1% agarose gel. sgRNAs for *Ae. aegypti* embryo injections were used at  
176 concentrations ranging between 70 ng/uL-180 ug/uL.

177

178 *Embryo injections and establishment of knock-out (KO) mosquito lines:* Four to 5 days after  
179 blood feeding, 5-10 mated females were placed into a *Drosophila* vial with damp cotton and  
180 filter paper and placed in the dark for 50 min to stimulate oviposition. To generate heritable  
181 mutations in *Ae. aegypti* mosquitoes, mixtures of selected sgRNAs were injected into pre-  
182 blastoderm-stage embryos of Cas9-expressing mosquitoes 1-2 hours after laying. Briefly,  
183 embryos were aligned (with posterior poles on one side) on damp filter paper using a  
184 paintbrush, transferred on a glass slide using double-sided scotch tape, dried for 1 min and  
185 covered with a mixture of Halocarbon 700 oil and Halocarbon 27 oil (1:1) to prevent further  
186 desiccation. Embryos were injected into the posterior poles with quartz needles (QF100-70-10,  
187 Sutter Instrument, Novato, CA, USA) pulled by a Sutter P2000 needle puller (program 50,  
188 HEAT=500, FIL=5, VEL=50, DEL=128, PUL=0), using a Femtojet injector (Eppendorf,  
189 Hamburg, Germany) and an InjectMan micromanipulator using the following settings:  
190 injection pressure (pi) 1,000 hPa, compensation pressure (pc) 700 hPa, injection time (manual  
191 mode) 2-3 sec. After injection, embryos were transferred on the damp filter paper into egg cups  
192 with wet cotton, kept in the humid insectary for 4-5 days, and then hatched. Injected embryos  
193 (G<sub>0</sub>) that hatched and survived until adulthood were crossed individually. Legs of G<sub>1</sub>  
194 mosquitoes were individually screened by PCR for the presence of deletions in the target gene  
195 as described below. A single heterozygous founder mosquito was outcrossed with wild-type  
196 age-matched *Ae. aegypti* mosquitoes to establish a KO mosquito line (see Results). As the  
197 target gene was located in the chromosome 1, the mutation was sex-linked [19]. As a result, to



198 obtain homozygous mutants of both sexes, the selection process relied on chromosome  
199 recombination and identification of recombinant mosquitoes.

200

201 *Mosquito screenings for mutations:* To screen live mosquitoes for the presence of deletions in  
202 the target gene, Phire Animal Tissue Direct PCR Kit (Thermo Fisher) was used according to  
203 manufacturers' instructions. Briefly, mosquitoes were anesthetized on ice, a leg from each  
204 mosquito was removed using sharp forceps and immersed into 20 ul of sample dilution buffer  
205 supplemented with 0.5 ul of DNA release reagent. Leg samples in dilution buffer were  
206 incubated for 3 min at 98°C then used in PCR reactions. Primer sequences are provided in  
207 Table 1.

208

209 To characterize the  $\alpha$ Man2 mutation at the transcript level, total RNA from  $\alpha$ Man2 KO and  
210 wild-type mosquitoes was purified using E.Z.N.A. Total RNA kit (Omega Bio-tek) and cDNA  
211 synthesized using a gene-specific reverse primer and SuperScript III First-Strand Synthesis  
212 System (Thermo Fisher) according to manufacturers' instructions. For cDNA synthesis,  
213 negative control gDNA from KO and wild-type mosquitoes was purified using  
214 E.Z.N.A MicroElute Genomic DNA Kit (Omega Bio-tek). PCR reactions were performed  
215 using Phire Animal Tissue Direct PCR Kit as described above. Information on primer  
216 sequences is in Table 1. For the detection of deletions in target genes, PCR products were  
217 separated by 2% agarose gel electrophoresis. Samples that separated into multiple bands were  
218 considered likely to contain an indel. The presence of  $\alpha$ Man2 deletion(s) in both DNA and  
219 mRNA was then confirmed by PCR and direct sequencing of the target region.

220

221 *Quantification of relative Wolbachia density.* Total DNA was extracted from *Wolbachia*-  
222 infected mosquito homogenates using a E.Z.N.A. Tissue DNA Kit (Omega Bio-Tek) kit

223 according to the manufacturer's instructions. qPCR was performed using PerfeCTa SYBR  
224 Green FastMix (Quantabio, Beverly, MA, USA) on a Rotor-Gene Q qPCR machine (Qiagen,  
225 Hilden, Germany) under the following thermocycling conditions: 95 °C for 2 min for initial  
226 denaturation; 40 cycles at 95 °C for 10 s, 60 °C for 40 s, 72 °C for 30 s for DNA amplification  
227 and data acquisition; 55–99 °C (5 s per increment) for the melt curve analysis. Relative  
228 *Wolbachia* densities were obtained by normalizing *Wolbachia* titers to the RpS17 gene levels  
229 as described previously [6]. Primer sequences are provided in Table 1. Crosses to introgress  
230 KO mutations into the *Wolbachia*-infected background are described in Results.

231

232 *Vector competence studies:* Four-to-five-day old female mosquitoes were blood fed for  
233 approximately 1 hour on infected human blood containing  $10^7$  infectious MAYV particles per  
234 mL or  $10^5 - 10^6$  infectious DENV particles per mL. After blood feeding, mosquitoes were  
235 anesthetized on ice and fully engorged females were transferred into cardboard cages; unfed  
236 females were discarded. Seven days post infection, mosquitoes were anesthetized using  
237 triethylamine (Sigma-Aldrich) and processed for vector competence assays. Mosquitoes were  
238 forced to salivate for 30 min into glass capillaries filled with a mix of 50% sucrose solution  
239 and FBS (1:1) to collect saliva samples. Body, legs, and saliva were then separately immersed  
240 in diluent solution containing 10% of FBS, 100 ug/mL of streptomycin, 100 units/mL of  
241 penicillin, 50 ug/mL gentamicin, and 2.5 µg/mL Amphotericin B in PBS. Body and legs  
242 samples were further homogenized by a single zinc-plated, steel, 4.5 mm bead using  
243 TissueLyser II (Qiagen) at 30 Hz for 2 min and centrifuged at 3,500 rpm at 4°C for 7 min in a  
244 bench top centrifuge to clear the homogenates. Samples were stored at -80°C. Virus titers in  
245 collected samples were determined by FFAs.

246

247 *Focus-forming assay for the quantification of MAYV and DENV:* Vero or C6/36 cells were  
248 seeded in 96-well plates at a density of  $3 \times 10^4$  cells/well or  $3 \times 10^5$  cells/well for the titration of  
249 MAYV or DENV, respectively. Ten-fold serial dilutions (in serum-free medium) of virus  
250 samples obtained from mosquito bodies and legs were prepared and 30  $\mu$ L of each were used  
251 in assays. Saliva samples were not further diluted. Cells were infected for 1 hour at 37°C or  
252 28°C for MAYV and DENV assays, respectively. Infectious solutions were then removed and  
253 cells covered with 100  $\mu$ L of complete growth medium (DMEM or RPMI) containing 0.8%  
254 methylcellulose (Sigma-Aldrich) and incubated at their respective temperatures. After 24 hours  
255 for MAYV or 3 days for DENV assays, overlay medium was removed, cells were fixed with  
256 4% formalin (Sigma-Aldrich) in PBS (Gibco/Thermo Fisher) for 15 min and permeabilized  
257 with 0.2% TritonX in PBS for 15 min. Primary antibodies were diluted in PBS and incubated  
258 overnight at 4°C. Secondary antibodies were incubated overnight at 4°C for MAYV assays and  
259 3 hours at room temperature for DENV. After the final wash, cells were dried briefly, and  
260 MAYV or DENV foci immediately counted using an Olympus BX41 inverted microscope  
261 equipped with an UPlanFI 4X objective and a FITC filter.

262

263 *Data analysis:* Infection, dissemination, and transmission rates were analyzed using  
264 contingency tables. Data on *Wolbachia* titers were analyzed by Mann-Whitney U tests. Due to  
265 violation of the equal variance assumption, data on viral titers were analyzed using the Brown,  
266 Forsythe ANOVA method with Welch's correction for multiple tests.

267

## 268 **Results**

269 *Generation of Wolbachia-negative and Wolbachia-positive  $\alpha$ Man2 KO Ae. aegypti*  
270 *mosquitoes:* To generate a deletion in the  $\alpha$ Man2 gene, *Ae. aegypti* embryos expressing Cas9  
271 protein ( $G_0$ , N=115) were injected with a mix of four sgRNAs targeting exon 5 of the gene.

272 Surviving G<sub>0</sub> individuals (females N=19, males N=10) were outcrossed to wild-type mates (1  
273 male per 1-2 females), females blood fed, eggs collected, and hatched in small batches for  
274 further screening (Fig. 1A). Forty G<sub>1</sub> male mosquitoes were individually screened by PCR for  
275 the presence of deletions in the target gene. Three G<sub>1</sub> males with  $\alpha$ Man2 deletions were  
276 identified: two with an identical 13 nt deletion and one with a double deletion allele consisting  
277 of a 46 nt deletion at one sgRNA target site and a 9 nt deletion at another sgRNA target site  
278 (55 nt deletion total) (Supplementary Figure 1A). This 55 nt deletion was predicted to result in  
279 a 155-amino acid-long truncated protein instead of a 1174-amino acid long functional enzyme.  
280 The male mosquito with two deletions (totaling 55 nt) was further crossed with 7 age-matched  
281 wild-type females to establish a line (Fig. 1A).

282

283 Since  $\alpha$ Man2 is located in on chromosome 1, deletions in this gene were expected to be sex-  
284 linked [19]. All G<sub>2</sub> male progeny from the selected heterozygous G<sub>1</sub> mutant mosquito that were  
285 screened (N=33) carried deletions, while the majority of G<sub>2</sub> females were wild-type. To obtain  
286 mutant females, we relied on identification of recombinant mosquitoes. Four out of 122  
287 screened G<sub>2</sub> females (3.3%) were recombinants and carried a deleted copy of  $\alpha$ Man2. These G<sub>2</sub>  
288 females were further crossed with wild-type males to obtain G<sub>3</sub> males with the mutation on the  
289 opposite chromosome. Homozygous mutant males were obtained via crossing G<sub>3</sub> mutant  
290 females and the generated G<sub>2</sub> mutant males. Homozygous mutant males and females were  
291 selected and crossed to obtain a homozygous  $\alpha$ Man2 KO line (Fig. 1B). The presence of  
292  $\alpha$ Man2 deletions in both DNA and mRNA was confirmed by PCR and direct sequencing of  
293 the target region (Supplementary Figure 1B).

294

295 To generate a *Wolbachia*-infected  $\alpha$ Man2 KO line, *Wolbachia*-infected *Ae. aegypti* females  
296 we crossed with  $\alpha$ Man2 KO *Wolbachia*-negative male mosquitoes so that CI would not

297 sterilize the cross [4]. Every generation after crossing was checked by PCR for the presence of  
298 both the mutation and *Wolbachia* infection, and heterozygous *Wolbachia*-infected males and  
299 females were crossed. Homozygous *Wolbachia*-infected males and heterozygous *Wolbachia*-  
300 infected females were selected and further crossed as described above to obtain homozygous  
301 *Wolbachia*-infected male and female mosquitoes. Homozygous *Wolbachia*-infected male and  
302 female mosquitoes were selected using PCR and crossed to establish a pure homozygous  
303 *Wolbachia*-infected  $\alpha$ Man2 KO mosquito line (Fig. 1C). *Wolbachia*-negative male mosquitoes  
304 from the parental Cas9-expressing *Ae. aegypti* line, which was used for embryo injections,  
305 were crossed with *Wolbachia*-infected *Ae. aegypti* females following similar procedure as  
306 described above to obtain a *Wolbachia*-infected wild-type control line with comparable genetic  
307 background for infection experiments.

308

309 *Effect of  $\alpha$ Man2 KO on Wolbachia titers in Ae. aegypti mosquitoes:* We tested the effect of  
310 gene KO on *Wolbachia* titers by qPCR and found that the  $\alpha$ Man2 KO mutation significantly  
311 increased mean *Wolbachia* levels by approximately 2-fold compared to the wild-type genetic  
312 background (Fig. 2).

313

314 *Effect of Wolbachia and  $\alpha$ Man2 KO on DENV infection, dissemination, and transmission*  
315 *rates:* DENV infection and dissemination rates were lower, but not significantly so, in  
316 *Wolbachia*-infected wild-type mosquitoes (50% vs. 36% infection). In *Wolbachia*-uninfected  
317 mosquitoes, the  $\alpha$ Man2 KO mutation was associated with significantly reduced DENV  
318 infection rates (16% vs 50%). Although either *Wolbachia* alone or the  $\alpha$ Man2 KO mutation  
319 alone both tended to reduce DENV infection and dissemination rates, the two effects were not  
320 additive. Rather, there was an interaction between *Wolbachia* infection status and genotype;  
321 when the  $\alpha$ Man2 KO mutation was present in a *Wolbachia*-infected background, infection rates

322 were similar to *Wolbachia*-uninfected wild-type mosquitoes (50% vs. 46%) (Table 2). We did  
323 not observe DENV transmission in any treatment.

324

325 *Effect of Wolbachia and  $\alpha$ Man2 KO on DENV titers in mosquitoes:* In a wild-type genetic  
326 background, DENV titers were significantly lower in *Wolbachia*-infected mosquitoes  
327 compared to uninfected (Fig. 3A); a demonstration of canonical *Wolbachia*-induced PB. In a  
328 *Wolbachia*-uninfected background, the  $\alpha$ Man2 KO mutation itself reduced DENV titers (Fig.  
329 3A). We observed an interaction between *Wolbachia* infection status and genotype, where the  
330  $\alpha$ Man2 KO mutation in a *Wolbachia*-infected background reduced the ability for *Wolbachia*  
331 to suppress DENV (Fig. 3A). DENV dissemination titers in mosquito legs between treatments  
332 did not significantly differ, possibly due to lower dissemination rates and resulting lack of  
333 power to detect a statistical difference (Supplementary Fig. 2A).

334

335 *Effect of Wolbachia and  $\alpha$ Man2 KO on MAYV infection, dissemination, and transmission*  
336 *rates:* MAYV infection and dissemination rates were higher generally compared to DENV,  
337 perhaps due to higher initial viral titers. 100% of wild-type, *Wolbachia*-uninfected mosquitoes  
338 became infected with and disseminated MAYV. *Wolbachia*-infected, wild-type mosquitoes  
339 had significantly reduced infection (45%) and dissemination (19%) rates as would be expected  
340 from *Wolbachia*-induced PB. Infection and dissemination rates in *Wolbachia* uninfected  
341  $\alpha$ Man2 KO mosquitoes were similar to uninfected wild-type mosquitoes.  $\alpha$ Man2 KO,  
342 *Wolbachia*-infected mosquitoes had the lowest infection (27%) and dissemination (8%) rates,  
343 opposite to what was observed for DENV. We did observe transmission of MAYV in these  
344 experiments, where the highest transmission rate (42%) was observed in wild-type *Wolbachia*-  
345 uninfected mosquitoes, and no transmission was observed in *Wolbachia*-infected mosquitoes,

346 regardless of genotype (Table 2). *Wolbachia* uninfected KO mosquitoes had intermediate  
347 transmission rates (33%) (Table 2).

348

349 *Effect of Wolbachia and  $\alpha$ Man2 KO on MAYV titers in mosquitoes:* In a wild-type genetic  
350 background, MAYV titers were significantly lower in *Wolbachia*-infected mosquitoes  
351 compared to uninfected (Fig. 3B); again consistent with canonical *Wolbachia*-induced PB.  
352 However, in a *Wolbachia*-uninfected background, the  $\alpha$ Man2 KO mutation was associated  
353 with enhanced MAYV titers compared to wild-type mosquitoes (Fig. 3B). In a *Wolbachia*-  
354 infected background, the  $\alpha$ Man2 KO mutation did not affect PB, and MAYV titers were  
355 indistinguishable from *Wolbachia*-infected wild-type mosquitoes (Fig 3B). MAYV  
356 dissemination titers in mosquito legs between treatments significantly differed in a similar  
357 pattern to body titers (Supplementary Fig. 2B).

358

## 359 **Discussion**

360 A recent genetic screen identified that single-nucleotide polymorphisms in the *Ae. aegypti*  
361  $\alpha$ Man2 gene were associated with stronger or weaker *Wolbachia* (wMel)-mediated PB of  
362 DENV [6], but the functional role of this gene in DENV blocking remains unclear. Due to the  
363 intronic location of the identified polymorphisms, it was hypothesized that they could affect  
364 gene expression or splicing; however, no significant differences in  $\alpha$ Man2 expression were  
365 found between selected low and high blocking mosquito populations [6]. We recently  
366 published a study [20] using RNAi to knock down expression of  $\alpha$ Man2 in *Wolbachia* infected  
367 and uninfected *Ae. aegypti* to examine its effect on PB for DENV and Chikungunya virus  
368 (CHIKV); an alphavirus closely related to MAYV [21]. RNAi demonstrated some influence  
369 of  $\alpha$ Man2 in PB, but results were not dramatic [20]. While RNAi silencing has become a  
370 cornerstone of genetic analysis in mosquitoes, the effects of this manipulation are generally

371 transient, with the length and strength of silencing varying depending on the tissue and the  
372 target gene [22]. In addition, protein turnover dynamics can affect the strength of any  
373 phenotypic effects resulting from gene knockdown [23]. Due to these issues, genetic ablation  
374 of the target gene of interest allows for much more robust interrogation of gene function. We  
375 used CRISPR-Cas9 gene editing to generate  $\alpha$ Man2 KO mutations in *Ae. aegypti* mosquitoes  
376 to functionally investigate the role of this gene in arbovirus replication and found that the  
377  $\alpha$ Man2 KO mutation affected arboviruses in a pathogen and *Wolbachia* infection-specific  
378 manner. This is especially interesting as the *Wolbachia* strain used in the original genetic screen  
379 [6] was *wMel* (originally from *Drosophila melanogaster*), while we performed experiments  
380 using the *Wolbachia* strain *wAlbB* (originally from *Ae. albopictus*). These two *Wolbachia*  
381 strains are not closely related, yet both seem to interact with  $\alpha$ Man2, suggesting that candidate  
382 genes identified by Ford et al. [6] may be broadly applicable across different *Wolbachia* strains.

383

384 Differences in viral phenotypes between mutant and wild-type mosquitoes in a *Wolbachia*-  
385 infected background cannot be explained by a direct effect of the KO mutation on *Wolbachia*  
386 titers. *Wolbachia* levels were approximately twice as high in  $\alpha$ Man2 KO mosquitoes compared  
387 to wild-type. While *Wolbachia*-induced suppression of MAYV was similar in both  $\alpha$ Man2 KO  
388 and wild-type mosquitoes, DENV was not blocked in *Wolbachia*-infected mutant mosquitoes,  
389 highlighting the complex interactions between the mosquito genome, *Wolbachia*, and the  
390 specific viral pathogen. *Wolbachia* loads can be affected by mosquito immunity [24], and the  
391 mosquito immune system can be modulated by glycosylation pathways [25], suggesting a  
392 potential explanation for higher *Wolbachia* titers in  $\alpha$ Man2 KO mosquitoes, although this  
393 phenomenon requires further study.

394



395 For DENV, the  $\alpha$ Man2 KO mutation itself conferred some resistance to virus, significantly  
396 reducing viral titer. *Wolbachia* alone also reduced viral titer. However, there was an interaction  
397 between  $\alpha$ Man2 genotype and *Wolbachia* infection; when the mutation was coupled with  
398 *Wolbachia* in the mosquito, DENV infections were no longer suppressed. We observed a  
399 different phenomenon with MAYV. In a *Wolbachia*-uninfected background, the  $\alpha$ Man2 KO  
400 mutation did not significantly alter viral infection rates but did significantly enhance viral titers  
401 in the mosquito. In a *Wolbachia*-infected background, the mutation increased the ability for  
402 *Wolbachia* to suppress viral infection rates and did not interfere with the ability for *Wolbachia*  
403 to suppress viral titers, although it did not further enhance *Wolbachia* PB.

404

405 The fact that the  $\alpha$ Man2 mutation (in the absence of *Wolbachia*) had different effects on DENV  
406 vs. MAYV is not necessarily surprising, as DENV is a flavivirus, while MAYV is an  
407 alphavirus. These two viral families are not closely related, and it has been demonstrated that  
408 the mosquito immune system responds differently to diverse viral groups [26]. The fact that  
409 the  $\alpha$ Man2 KO mutation can have different effects on how *Wolbachia* suppresses different  
410 viral families is perhaps also not surprising, as *Wolbachia* has been shown to differentially  
411 suppress different pathogens in other systems [27-29]. Ultimately, these data demonstrate the  
412 complexity of the *Wolbachia* PB phenotype. In their screens, Ford et al. [6,7] identified dozens  
413 of potential candidate genes regulating PB; here we have disrupted one of them. It is likely that  
414 disruption of other candidates could have equally complex consequences, to say nothing of  
415 multiple stacked mutations.

416

417 While our data show that *Ae. aegypti*  $\alpha$ Man2 is a modulator of arbovirus infection, and  
418 involved in the *Wolbachia* PB phenotype, the mechanism by which it works, and has variable

419 effects on different viruses, remains unclear.  $\alpha$ Man2 is involved in protein glycosylation [8],  
420 which may affect viral biogenesis, replication, and infectivity [11], so it is logical that  
421 disruption of this gene would affect viral infection phenotypes. However, CRISPR is a blunt  
422 tool, and further molecular research is necessary to determine the specific mechanism by which  
423  $\alpha$ Man2 modulates replication of specific viruses and how it contributes to *Wolbachia* PB.

424

425

#### 426 **List of abbreviations**

427 cDNA — complementary DNA

428 CI — cytoplasmic incompatibility

429 DENV — dengue virus

430 DMEM — Dulbecco's Modified Eagle Medium

431 DPI — days post infection

432 FBS — Fetal bovine serum

433 FFA — focus-forming assay

434 FFU — focus-forming unit

435 gDNA — genomic DNA

436 GE — Genome equivalent

437 KO — knockout

438 MAYV — Mayaro virus

439 PB — pathogen blocking

440 PBS — Phosphate-buffered saline

441 PFU — Plaque-forming unit

442 qPCR — Quantitative polymerase chain reaction

443

444 **Declarations**

445 **Ethics approval and consent to participate**

446 Not applicable.

447

448 **Consent for publication**

449 Not applicable.

450

451 **Availability of data and materials**

452 All data generated or analyzed during this study are included in this published article.

453

454 **Competing interests**

455 The authors declare that they have no competing interests.

456

457 **Funding**

458 This research was supported by NIH grants R01AI116636 and R01AI150251, and NSF grant

459 1645331 to JLR, NIH grant R01AI143758 to EAM, USAID grant AID-OAA-F-16-00082 to

460 ZX, NIH grants R01AI151004, DP2AI152071, and R21AI156078, and DARPA Safe Genes

461 Program Grant HR0011-17-2-0047 to OSA, and by a grant from Pebble Labs, Inc. to JLR,  
462 EAM, and ZX.

#### 463 **Authors' contributions**

464 NU, VMM, EAM and JLR conceived and designed the study; NU, REJ, AH, VMM, MJJ, LTS  
465 performed the experiments; NU, JLR analyzed the data; OSA, ML, ZX, KL, RS, EAM, JLR  
466 contributed reagents and materials; NU, JLR drafted the manuscript; all authors read and  
467 approved the final version of the manuscript.

468

#### 469 **Acknowledgments**

470 We would like to thank Dr. Duverney Chaverra-Rodriguez for valuable advice concerning  
471 CRISPR experiments and Hillery Metz for valuable comments on a draft version of the  
472 manuscript.

473

474

475

476

477

478

479

480

481

482

483

484

## 485   **References**

- 486       1. Bhatt S, Gething PW, Brady OJ, Messina JP, Farlow AW, Moyes CL, Drake JM,  
487       Brownstein JS, Hoen AG, Sankoh O, Myers MF, George DB, Jaenisch T, Wint GR,  
488       Simmons CP, Scott TW, Farrar JJ, Hay SI. The global distribution and burden of  
489       dengue. *Nature*. 2013; 496:504-507.
- 490       2. Pereira TN, Carvalho FD, De Mendonça SF, Rocha MN, Moreira LA. Vector  
491       competence of *Aedes aegypti*, *Aedes albopictus*, and *Culex quinquefasciatus*  
492       mosquitoes for Mayaro virus. *PLoS Negl Trop Dis*. 2020;14:e0007518.
- 493       3. Sicard M, Bonneau M, Weill M. Wolbachia prevalence, diversity, and ability to induce  
494       cytoplasmic incompatibility in mosquitoes. *Curr Opin Insect Sci*. Netherlands;  
495       2019;34:12–20.
- 496       4. Beckmann JF, Bonneau M, Chen H, Hochstrasser M, Poinso D, Mercot H, et al. The  
497       Toxin-Antidote Model of Cytoplasmic Incompatibility: Genetics and Evolutionary  
498       Implications. *Trends Genet*. England; 2019;35:175–85.
- 499       5. Caragata EP, Dutra HLC, Sucupira PHF, Ferreira AGA, Moreira LA. Wolbachia as  
500       translational science: controlling mosquito-borne pathogens. *Trends Parasitol*.  
501       England; 2021; 37:1050-67.
- 502       6. Ford SA, Allen SL, Ohm JR, Sigle LT, Sebastian A, Albert I, et al. Selection on *Aedes*  
503       aegypti alters Wolbachia-mediated dengue virus blocking and fitness. *Nat Microbiol*.  
504       2019;4:1832–9.
- 505       7. Ford SA, Albert I, Allen SL, Chenoweth SF, Jones M, Koh C, et al. Artificial Selection  
506       Finds New Hypotheses for the Mechanism of Wolbachia-Mediated Dengue Blocking  
507       in Mosquitoes. *Front Microbiol*. 2020;11:1456.

- 508 8. Nemčovičová I, Šesták S, Rendić D, Plšková M, Mucha J, Wilson IBH.  
509 Characterisation of class I and II  $\alpha$ -mannosidases from *Drosophila melanogaster*.  
510 *Glycoconj J. United States*; 2013;30:899–909.
- 511 9. Schiller B, Hykollari A, Yan S, Paschinger K, Wilson IBH. Complicated N-linked  
512 glycans in simple organisms. *Biol Chem.* 2012;393:661–73.
- 513 10. Yap SSL, Nguyen-Khuong T, Rudd PM, Alonso S. Dengue Virus Glycosylation: What  
514 Do We Know? *Front Microbiol.* 2017;8:1415.
- 515 11. Rogers KM, Heise M. Modulation of cellular tropism and innate antiviral response by  
516 viral glycans. *J Innate Immun.* 2009;1:405–12.
- 517 12. Vigerust DJ, Shepherd VL. Virus glycosylation: role in virulence and immune  
518 interactions. *Trends Microbiol.* 2007;15:211–8.
- 519 13. Pérez-García LA, Martínez-Duncker I, Mora Montes HM. The Endoplasmic Reticulum  
520 Alpha-Glycosidases as Potential Targets for Virus Control. *Curr Protein Pept Sci.*  
521 *United Arab Emirates*; 2017;18:1090–7.
- 522 14. Chang J, Block TM, Guo J-T. Antiviral therapies targeting host ER alpha-glucosidases:  
523 current status and future directions. *Antiviral Res.* 2013;99:251–60.
- 524 15. Bennett KE, Olson KE, Munoz M de L, Fernandez-Salas I, Farfan-Ale JA, Higgs S, et  
525 al. Variation in vector competence for dengue 2 virus among 24 collections of *Aedes*  
526 *aegypti* from Mexico and the United States. *Am J Trop Med Hyg. United States*;  
527 2002;67:85–92.
- 528 16. Terradas G, Joubert DA, McGraw EA. The RNAi pathway plays a small part in  
529 *Wolbachia*-mediated blocking of dengue virus in mosquito cells. *Sci Rep. England*;  
530 2017;7:43847.

- 531 17. Li M, Bui M, Yang T, Bowman CS, White BJ, Akbari OS. Germline Cas9 expression  
532 yields highly efficient genome engineering in a major worldwide disease vector, *Aedes*  
533 *aegypti*. *Proc Natl Acad Sci U S A. United States*; 2017;114:E10540–9.
- 534 18. Concordet J-P, Haeussler M. CRISPOR: intuitive guide selection for CRISPR/Cas9  
535 genome editing experiments and screens. *Nucleic Acids Res.* 2018;46:W242–5.
- 536 19. Hall AB, Basu S, Jiang X, Qi Y, Timoshevskiy VA, Biedler JK, et al. SEX  
537 DETERMINATION. A male-determining factor in the mosquito *Aedes aegypti*.  
538 *Science. United States*; 2015;348:1268–70.
- 539 20. Sigle LT, Jones M, Novelo M, Ford SA, Urakova N, Lympelopoulos K, Sayre RT, Xi  
540 Z, Rasgon JL, McGraw EA. Assessing *Aedes aegypti* candidate genes during viral  
541 infection and *Wolbachia*-mediated pathogen blocking. *Insect Mol Biol.* 2022. Feb 3.  
542 doi:10.1111/imb.12764.
- 543 21. Brustolin M, Pujhari S, Henderson CA, Rasgon JL. Anopheles mosquitoes may drive  
544 invasion and transmission of Mayaro virus across geographically diverse regions. *PLoS*  
545 *NTD.* 2018; 12(11):e0006895.
- 546 22. Boisson B, Jacques JC, Choumet V, Martin E, Xu J, Vernick K, Bourgouin C. Gene  
547 silencing in mosquito salivary glands by RNAi. *FEBS Lett.* 2006;580(8):1988-92.
- 548 23. Liu K, Tsujimoto H, Cha SJ, Agre P, Rasgon JL. Aquaporin water channel AgAQP1  
549 in the malaria vector mosquito *Anopheles gambiae* during blood feeding and humidity  
550 adaptation. *Proc Natl Acad Sci U S A.* 2011;108:6062-6.
- 551 24. Pan X, Pike A, Joshi D, Bian G, McFadden MJ, Lu P, Liang X, Zhang F, Raikhel AS, Xi Z.  
552 The bacterium *Wolbachia* exploits host innate immunity to establish a symbiotic relationship  
553 with the dengue vector mosquito *Aedes aegypti*. *ISME J.* 2018;12:277-288.
- 554 25. Bednarska NG, Wren BW, Willcocks SJ. The importance of the glycosylation of antimicrobial  
555 peptides: natural and synthetic approaches. *Drug Discov Today.* 2017;22:919-926.

- 556 26. Samuel GH, Adelman ZN, Myles KM. Antiviral Immunity and Virus-Mediated  
557 Antagonism in Disease Vector Mosquitoes. *Trends Microbiol.* 2018;26:447–61.
- 558 27. Hughes GL, Koga R, Xue P, Fukatsu T, Rasgon JL. Wolbachia infections are virulent  
559 and inhibit the human malaria parasite *Plasmodium falciparum* in *Anopheles gambiae*.  
560 *PLoS Pathog.* 2011;7(5):e1002043.
- 561 28. Hughes GL, Vega-Rodriguez J, Xue P, Rasgon JL. Wolbachia strain wAlbB enhances  
562 infection by the rodent malaria parasite *Plasmodium berghei* in *Anopheles gambiae*  
563 mosquitoes. *Appl Environ Microbiol.* 2012;78:1491-1495.
- 564 29. Fraser JE, O'Donnell TB, Duyvestyn JM, O'Neill SL, Simmons CP, Flores HA. Novel  
565 phenotype of Wolbachia strain wPip in *Aedes aegypti* challenges assumptions on  
566 mechanisms of Wolbachia-mediated dengue virus inhibition. *PLoS Pathog.*  
567 2020;16:e1008410.
- 568
- 569
- 570
- 571
- 572
- 573
- 574
- 575
- 576
- 577
- 578
- 579
- 580



581 **Figure legends**

582 Figure 1. Overview of the approach used to generate *Ae. aegypti* strains used in this study. A)  
583 Generation of  $\alpha$ Man2 KO mutations using CRISPR-Cas9 mutagenesis. B) Crossing scheme to  
584 generate a homozygous  $\alpha$ Man2 KO line. C) Crossing scheme to generate a homozygous  
585  $\alpha$ Man2 KO line infected with *Wolbachia*.

586

587 Figure 2. *Wolbachia* titers in  $\alpha$ Man2 KO and wild-type mosquitoes. Mutant mosquitoes had  
588 significantly higher levels of *Wolbachia* compared to wild-type ( $P = 0.0007$ ).

589

590 Figure 3. A) DENV) and B) MAYV body titers in experimental mosquitoes 7 days post-  
591 infection. Red = DENV; Blue = MAYV; Squares = *Wolbachia*-uninfected; Circles =  
592 *Wolbachia*-infected; Filled symbols = wild-type; open symbols =  $\alpha$ Man2 KO. Viruses were  
593 analyzed separately; treatments with different letters are significantly different ( $P < 0.01$ ).

594

595 Table 1. Primer and oligonucleotide sequences used in this study.

596

597 Table 2. Virus infection, dissemination, and transmission rates for experimental treatments 7  
598 days post-infection.

599

600

601

602

603 Supplementary Figure 1. Verification of gene deletions. A) *In vitro* cleavage assay to validate  
604 sgRNAs; B) Sequencing data for identified male mosquito with two deletions totaling 55 nt in  
605 the  $\alpha$ Man2 gene: colored dots represent identical nucleotides, grey tildes represent deleted  
606 nucleotides; C) PCR identification of heterozygous male mosquito carrying the  $\alpha$ Man2 55 nt  
607 mutation; D) Detection of  $\alpha$ Man2 deletion in gDNA and mRNA. Two sets of primers were  
608 used: one that binds gDNA in intronic regions outside the target exon and one that binds cDNA  
609 in adjacent exons. The former primer set does not yield any product on the cDNA template as  
610 the binding regions are removed during RNA splicing. The latter primer set does not yield any  
611 product under the given PCR conditions if only gDNA template is present, as in gDNA, primers  
612 are separated by extended intronic regions and the fragment doesn't amplify.

613

614 Supplementary Figure 2. A) DENV) and B) MAYV leg titers in experimental mosquitoes 7  
615 days post-infection. Red = DENV; Blue = MAYV; Squares = *Wolbachia*-uninfected; Circles  
616 = *Wolbachia*-infected; Filled symbols = wild-type; open symbols =  $\alpha$ Man2 KO. Viruses were  
617 analyzed separately; treatments with different letters are significantly different ( $P < 0.001$ ).

618

619

| <b>Table 1.</b>              |                                                                                |
|------------------------------|--------------------------------------------------------------------------------|
| <b>Primer</b>                | <b>Sequence 5'→ 3'</b>                                                         |
| DENVF                        | AAGGACTAGAGGTTAGAGGAGACCC                                                      |
| DENVR                        | CGTTCTGTGCCTGGAATGATG                                                          |
| DENVProbe                    | /56-FAM/AACAGCATATTGACGCTGGGAGAGACCAGA/3BHQ_1/                                 |
| Reverse (used for all sgRNA) | AAAAGCACCGACTCGGTGCCACTTTTTCAAGTTGATAACGGACTAGCCTTATTTAACTTGCTATTCTAGCTCTAAAAC |
| guideRNA7rvT7crTarget        | GAAATTAATACGACTCACTATAG <b>gctggtcggatctgcatga</b> GTTTTAGAGCTAGAAATAGCAAG     |
| guideRNA103fwT7crTarget      | GAAATTAATACGACTCACTATAG <b>gaatctcaattgatcaacaa</b> GTTTTAGAGCTAGAAATAGCAAG    |
| guideRNA220fwT7crTarget      | GAAATTAATACGACTCACTATAG <b>gctgctgctgagcagtgge</b> GTTTTAGAGCTAGAAATAGCAAG     |
| guideRNA297rvT7crTarget      | GAAATTAATACGACTCACTATAG <b>gaattccatactatcgc</b> GTTTTAGAGCTAGAAATAGCAAG       |
| Man2KO F (genomic DNA)       | CCCGGTTTCTTCTCCATCTCG                                                          |
| Man2KO R (genomic DNA)       | CGACTGTAGTAGCTGCTGATGCTAGAGG                                                   |
| Man2KO F (cDNA)              | CTCGATGGGACAGCCATCAAACACGC                                                     |
| man2KO R (cDNA)              | GGCTCTCGAAGTCTTGTCCAGTATTCC                                                    |
| Wolbachia F                  | CCTTACCTCCTGCACAACAA                                                           |
| Wolbachia R                  | GGATTGTCCAGTGGCCTTA                                                            |
| RpS17 F                      | TCCGTGGTATCTCCATCAAGCT                                                         |
| RpS17 R                      | CACTCCGGCACGTAGTTGTC                                                           |

sgRNA target sequences in templates are shown as bolded low case letters; if sgRNA sequence started with the nucleotide other than guanine (G), additional G was added in the primer at the beginning of the guide sequence to ensure the efficient transcription by the T7 RNA polymerase.

| <b>Table 2.</b> |                 |                  |          |                    |            |                        |            |                       |            |
|-----------------|-----------------|------------------|----------|--------------------|------------|------------------------|------------|-----------------------|------------|
| <b>Virus</b>    | <b>Genotype</b> | <b>Wolbachia</b> | <b>N</b> | <b>Infection %</b> | <b>Sig</b> | <b>Dissemination %</b> | <b>Sig</b> | <b>Transmission %</b> | <b>Sig</b> |
| DENV            | WT              | No               | 36       | 0.50               | a          | 0.22                   | a          | 0.00                  | a          |
| DENV            | WT              | Yes              | 69       | 0.36               | a          | 0.07                   | a,b        | 0.00                  | a          |
| DENV            | Man2 KO         | No               | 37       | 0.16               | b          | 0.03                   | a,b        | 0.00                  | a          |
| DENV            | Man2 KO         | Yes              | 46       | 0.46               | a          | 0.02                   | b,c        | 0.00                  | a          |
| MAYV            | WT              | No               | 71       | 1.00               | a          | 1.00                   | a          | 0.42                  | a          |
| MAYV            | WT              | Yes              | 64       | 0.45               | b          | 0.19                   | b          | 0.00                  | c          |
| MAYV            | Man2 KO         | No               | 43       | 0.98               | a          | 0.95                   | a          | 0.33                  | b,c        |
| MAYV            | Man2 KO         | Yes              | 66       | 0.27               | c          | 0.08                   | b          | 0.00                  | c          |

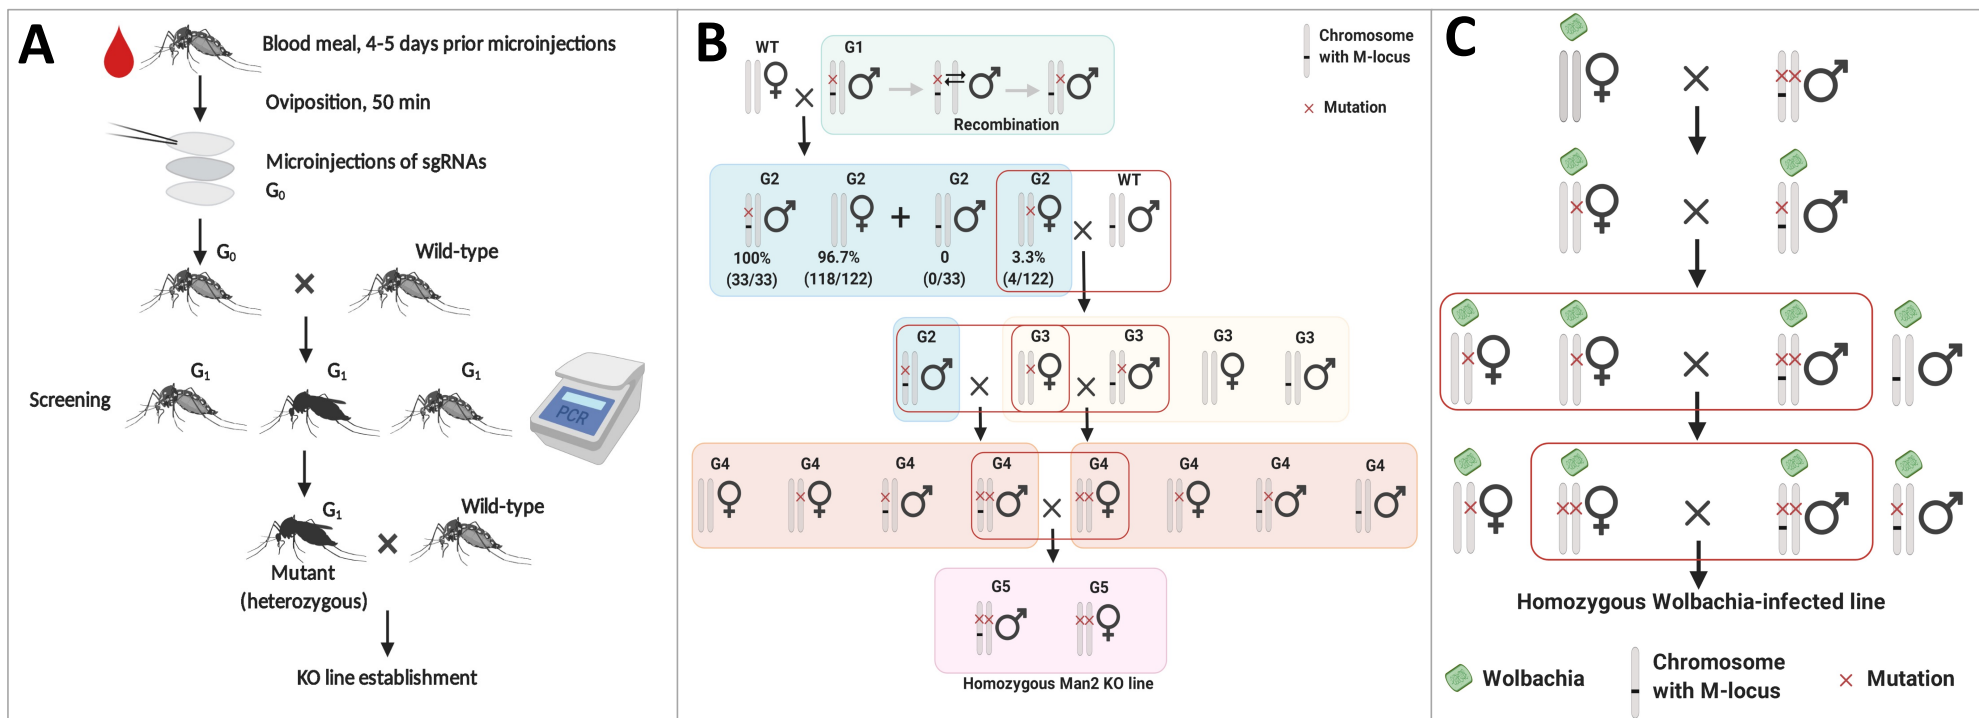

Figure 1

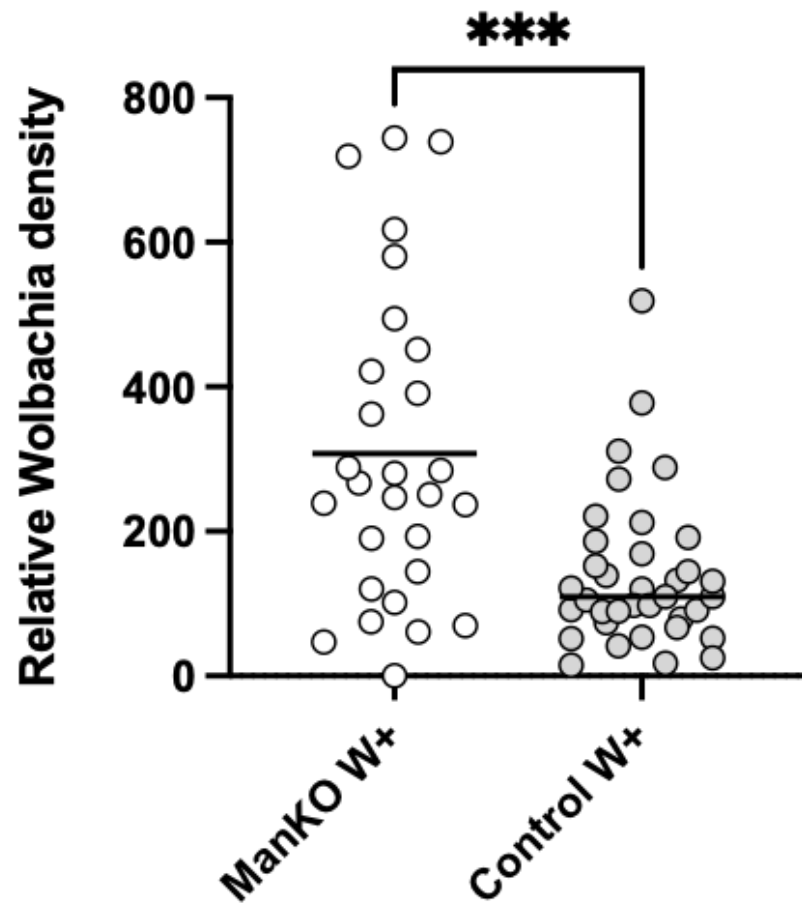

Figure 2

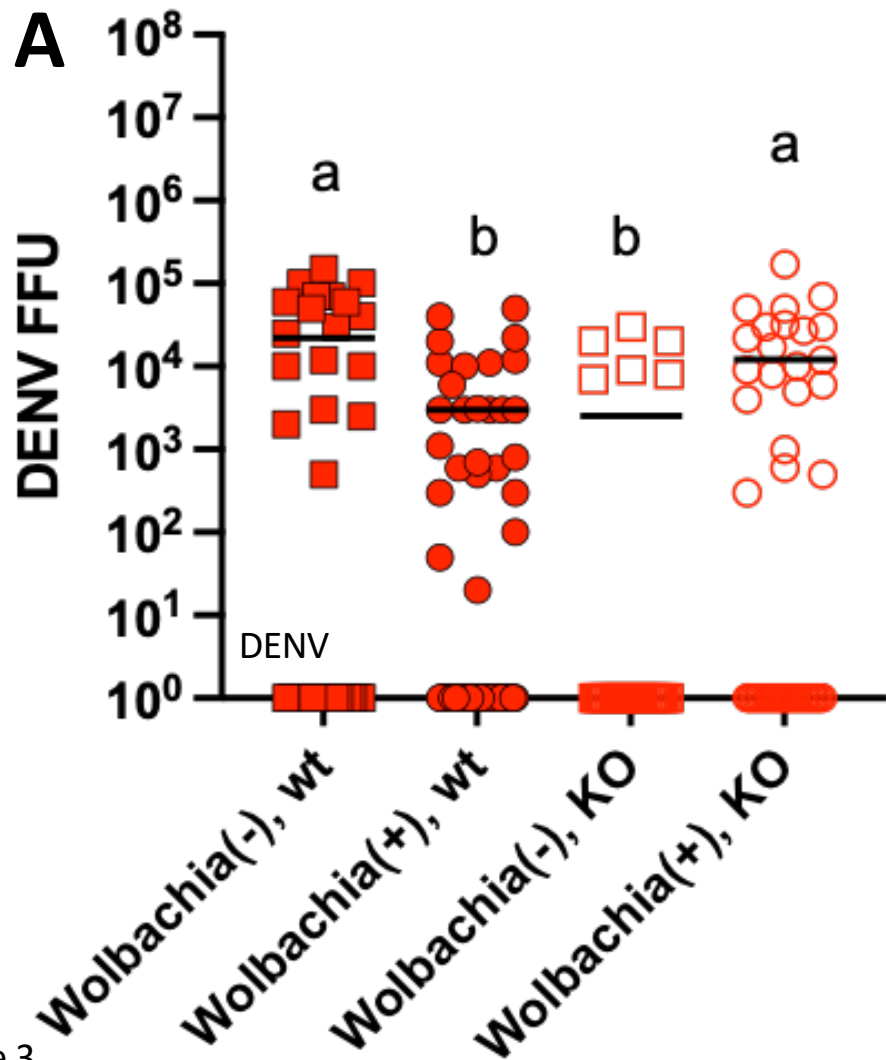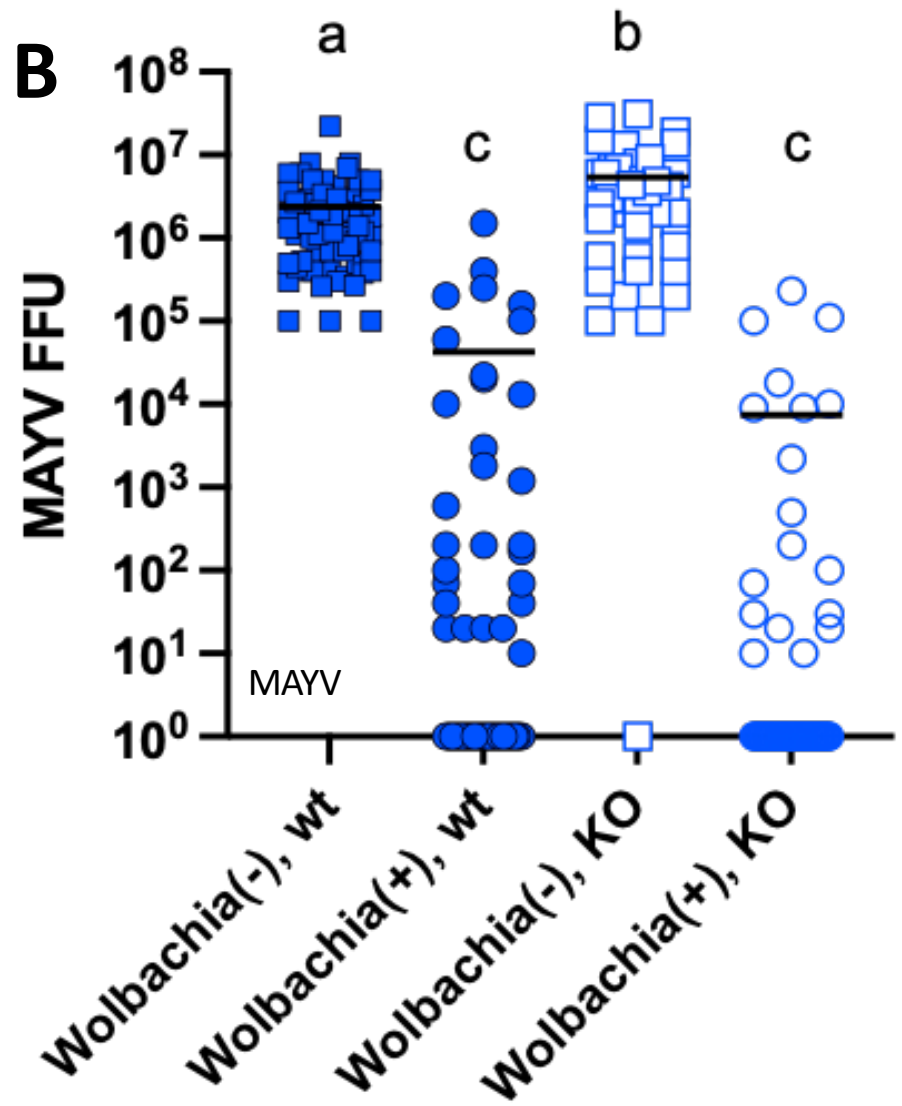

Figure 3

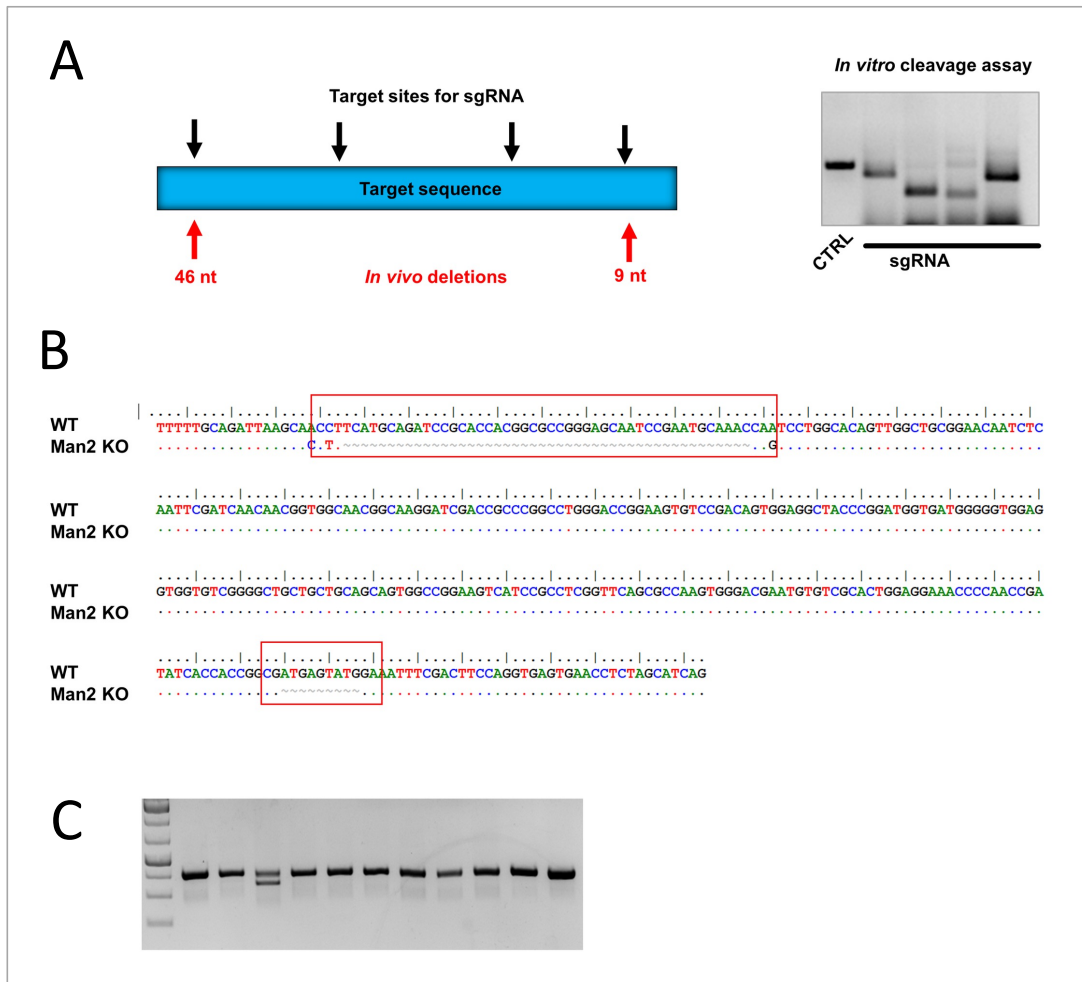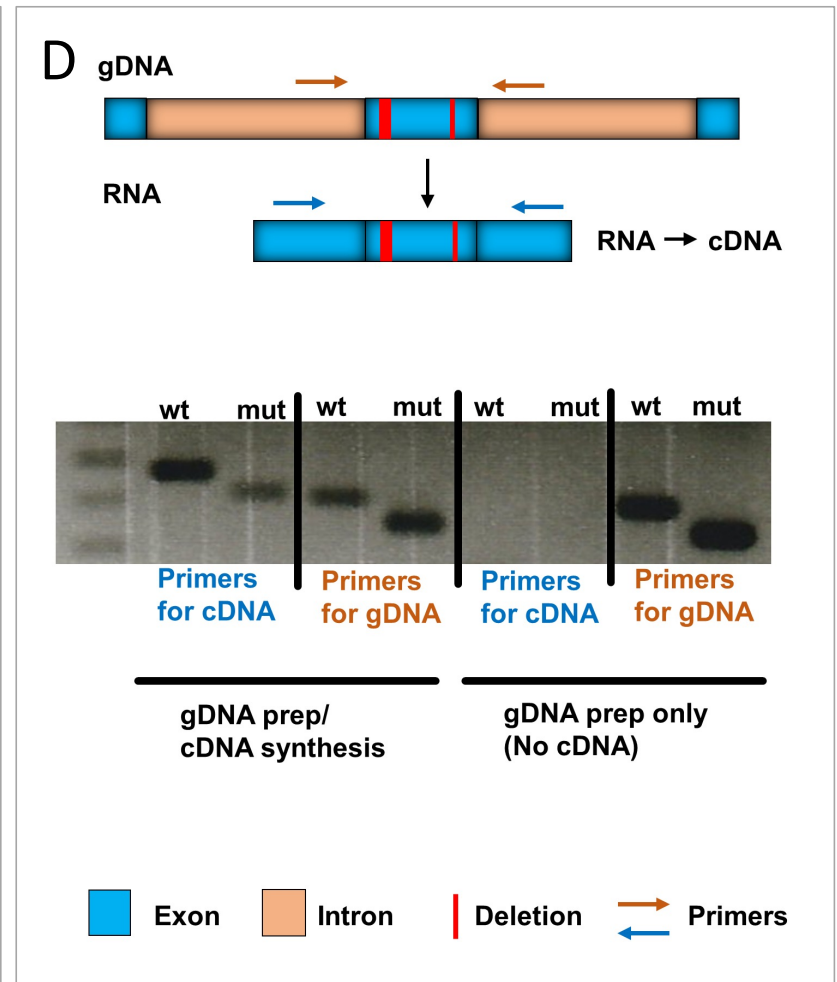

Supplemental Figure 1

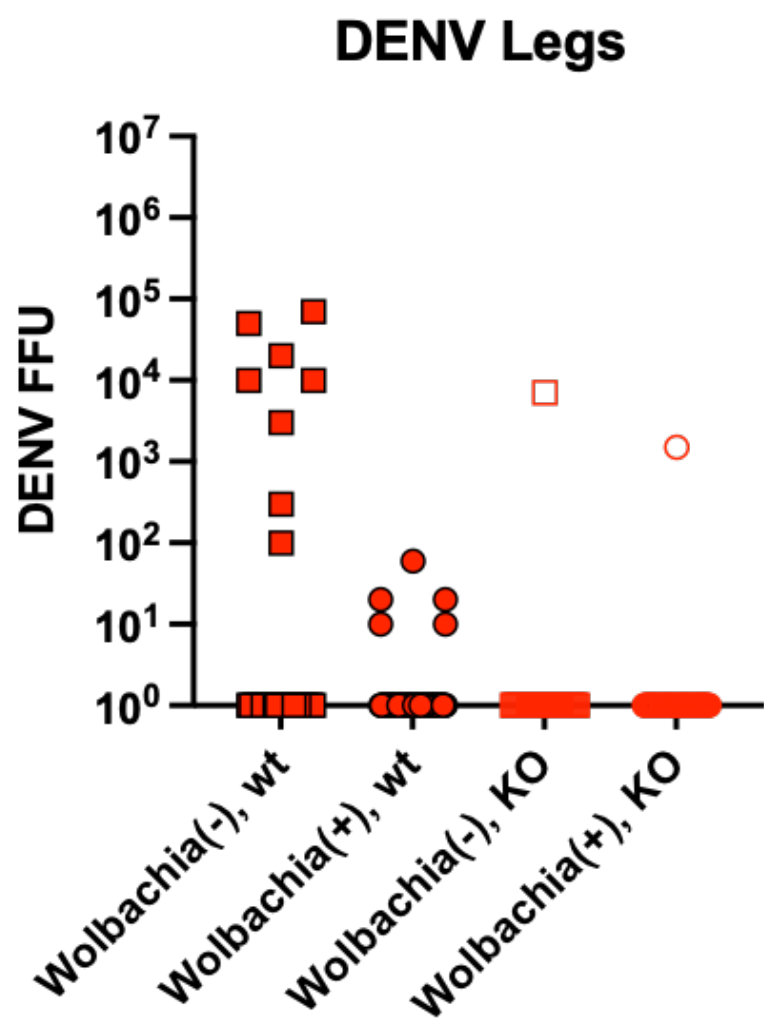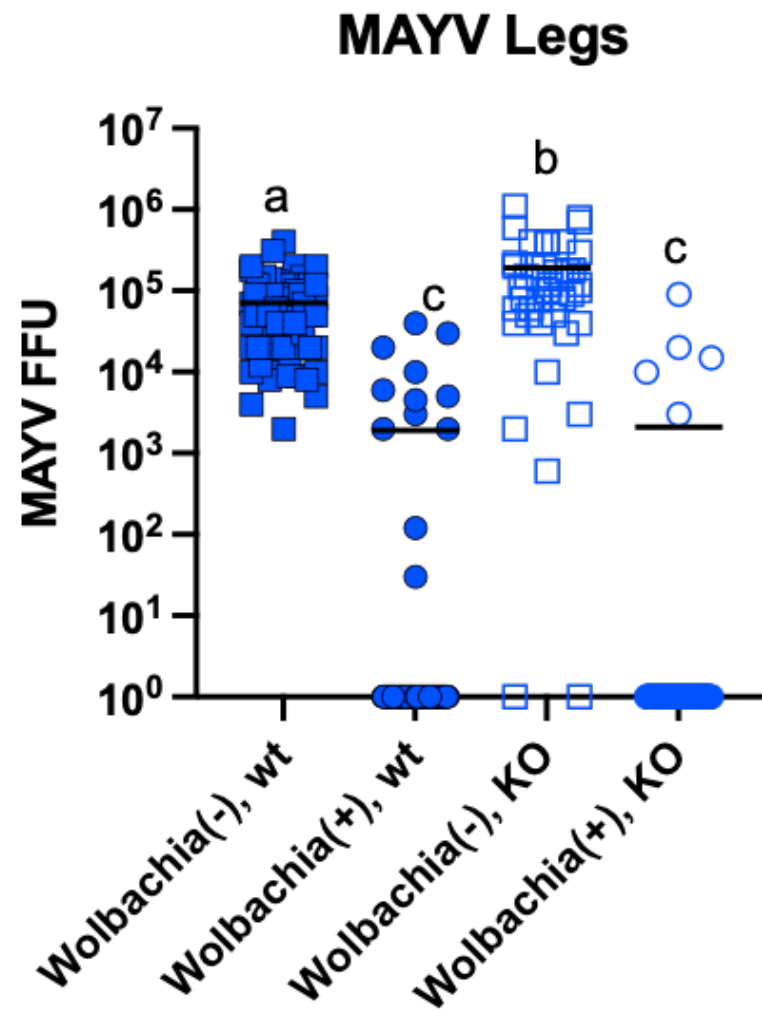

Supplemental Figure 2
